# Supplementary material for: Hepatitis B virus promotes β-catenin-signalling and disassembly of adherens junctions in a Src kinase dependent fashion
Source: PubMed Central journal article supplement (PMC6188061; doi:10.18632/oncotarget.26103), 2018-09-21
Supplement: oncotarget-09-33947-s001.pdf [file oncotarget-09-33947-s001.pdf]

## Hepatitis B virus promotes $\beta$ -catenin-signalling and disassembly of adherens junctions in a Src kinase dependent fashion

### SUPPLEMENTARY MATERIALS

Supplementary Table 1: Plasmids used for transfection of cells in 6 well plates ( $7.8 \times 10^5$  cells per well)

| Plasmid (Concentration)               | Construct                                                                                                        | Manufacturer/Provided by                                            |
|---------------------------------------|------------------------------------------------------------------------------------------------------------------|---------------------------------------------------------------------|
| pTH1.3 (2 $\mu$ g/well)               | 1.3-fold overlength HBV genome [1]                                                                               | Heinz Schaller, (Center for Molecular Biology, Heidelberg, Germany) |
| pTH1.3x <sup>-</sup> (2 $\mu$ g/well) | 1.3-fold overlength HBV genome + premature stop-codon into 5' and 3' X ORF confirmed by sequencing [1]           |                                                                     |
| pGL3/TOPflash (150 ng/well)           | SV40 promoter containing <i>firefly</i> luciferase gene under control of 5x consensus                            | Hans Clevers (Hubrecht Laboratory, Utrecht, The Netherlands)        |
| pGL3/FOPflash (150 ng/well)           | wild-type Tcf/LEF binding elements or mutant Tcf/LEF binding elements [2]                                        |                                                                     |
| pRL-tk (37.5 ng/well)                 | Herpes simplex virus thymidine kinase promoter containing <i>renilla luciferase</i> as internal control reporter | Promega (Mannheim, Germany)                                         |

**Supplementary Table 2: Sequences of primers used for LightCycler™ real-time PCR**

| <b>Target gene</b>              | <b>Sequence forward</b> | <b>Sequence reverse</b> |
|---------------------------------|-------------------------|-------------------------|
| E-cadherin                      | CCCCAGAGGATGACAC        | GGGTCAGTATCAGCCG        |
| β-catenin                       | AACGGCTTTCAGTTGAG       | TTGCTGTCACCTGGAG        |
| aminolevulinate synthase (ALAS) | CAACATCTCAGGCACCAGTA    | CTCCACTGTTACGGATACCT    |
| GAPDH                           | GGTATCGTGGAAGGACT       | GGGTGTCGCTGTTGAA        |
| glutamine synthetase (GS)       | AAGTGTGTGGAAGAGTTGCC    | TGCTCACCATGTCCATTATC    |

**Supplementary Table 3: Primary antibodies used for Western blot (WB) and immunofluorescence (IF)**

| <b>Target</b>                                 | <b>Source</b> | <b>Working dilution</b>     | <b>Manufacturer/Provided by</b>                                     |
|-----------------------------------------------|---------------|-----------------------------|---------------------------------------------------------------------|
| $\beta$ -catenin (monoclonal antibody, (mAb)) | Mouse         | 1:500 (WB + IF)             | BD Transduction Laboratories (San Jose, CA, USA)                    |
| E-cadherin (mAb)                              | Mouse         | 1:2500 (WB)                 |                                                                     |
| Human-E-cadherin (mAb)                        | Mouse         | 1:100 (WB)                  | Clone HEC1, Zymed Laboratories Inc. (San Francisco, CA, USA)        |
| Src (mAb)                                     | Rabbit        | 1:1000 (WB)                 | Cell Signaling (Danvers, MA, USA)                                   |
| Phospho-src family (Tyr416) (polyclonalAb)    | Rabbit        | 1:1000 (WB)                 |                                                                     |
| c-myc                                         | Mouse         | 2 $\mu$ g/ml (WB)           | BD Biosciences Pharmingen (San Jose, CA, USA)                       |
| HBV core (H800) (polyclonalAb)                | Rabbit        | 1:10000 (WB)<br>1:5000 (IF) | Heinz Schaller (Center for Molecular Biology, Heidelberg, Germany). |

## REFERENCES

1. Untergasser A, Protzer U. Hepatitis B virus-based vectors allow the elimination of viral gene expression and the insertion of foreign promoters. *Hum Gene Ther.* 2004; 15:203–10.
2. Korinek V, Barker N, Morin PJ, van Wichen D, de Weger R, Kinzler KW, Vogelstein B, Clevers H. Constitutive transcriptional activation by a beta-catenin-Tcf complex in APC<sup>-/-</sup> colon carcinoma. *Science.* 1997; 275:1784–87.
